# Supplementary material for: PRP4 Induces Epithelial–Mesenchymal Transition and Drug Resistance in Colon Cancer Cells via Activation of p53
Source: MDPI journal article supplement (doi:10.3390/ijms23063092), 2022-03-13
Supplement: s1 [file s1]

**Table S3. List of PRP4 downregulated miRNAs.** 2 miRNAs were downregulated by PRP4 over-expression in HCT116 cells. RQ value < 1.

| <b>RQ</b>  | <b>CTRL</b> | <b>PRP4</b> |
|------------|-------------|-------------|
| mir-18a-5p | 1           | 0.925304    |
| mir-144-3p | 1           | 0.893785    |
