# Supplementary material for: PRP4 Induces Epithelial–Mesenchymal Transition and Drug Resistance in Colon Cancer Cells via Activation of p53
Source: MDPI journal article supplement (doi:10.3390/ijms23063092), 2022-03-13
Supplement: s1 [file s1]

**Table S2. List of PRP4 upregulated miRNAs.** 13 miRNAs were upregulated by PRP4 transfection to HCT116 cells (RQ value > 1.5). The threshold we used to screen up- or downregulated miRNAs was a fold-change  $\geq 1.5$  or  $\leq 1.0$ .

| <b>RQ</b>   | <b>CTRL</b> | <b>PRP4</b> |
|-------------|-------------|-------------|
| mir-142-3p  | 1           | 2.24        |
| mir-146a-5p | 1           | 2.108       |
| mir-32-5p   | 1           | 2.021       |
| mir-155-5p  | 1           | 2.006       |
| mir-142-5p  | 1           | 1.851       |
| mir-223-3p  | 1           | 1.796       |
| mir-210     | 1           | 1.790       |
| mir-96-5p   | 1           | 1.693       |
| mir-194-5p  | 1           | 1.623       |
| mir-376c-3p | 1           | 1.614       |
| mir-143-3p  | 1           | 1.586       |
| mir-141-3p  | 1           | 1.550       |
| mir-21-5p   | 1           | 1.524       |
