# Supplementary material for: PRP4 Induces Epithelial–Mesenchymal Transition and Drug Resistance in Colon Cancer Cells via Activation of p53
Source: MDPI journal article supplement (doi:10.3390/ijms23063092), 2022-03-13
Supplement: s1 [file s1]

**Table S1. List of all PRP4 regulated miRNAs.** 84 miRNAs were found to be regulated by PRP4 over-expression in HCT116 cells.

| RQ            | CTRL | PRP4     | RQ          | CTRL | PRP4     | RQ          | CTRL | PRP4     |
|---------------|------|----------|-------------|------|----------|-------------|------|----------|
| mir-151a-5p   | 1    | 1.378405 | mir-142-5p  | 1    | 1.850609 | mir-194-5p  | 1    | 1.623379 |
| mir-195-5p    | 1    | 1.233707 | mir-9-5p    | 1    | 1.199971 | mir-210     | 1    | 1.79005  |
| mir-143-3p    | 1    | 1.585568 | mir-150-5p  | 1    | 1.276329 | mir-15a-5p  | 1    | 1.276329 |
| mir-30d-5p    | 1    | 1.367935 | mir-27b-3p  | 1    | 1.408344 | mir-181a-5p | 1    | 1.470187 |
| mir-191-5p    | 1    | 1.251796 | mir-101-3p  | 1    | 1.44093  | mir-15b-5p  | 1    | 1.223488 |
| mir-let.7i.5p | 1    | 1.18756  | let-7d-5p   | 1    | 1.360371 | mir-99a-5p  | 1    | 1.155887 |
| mir-302a-3p   | 1    | 1.209156 | mir-103a-3p | 1    | 1.220947 | mir-28-5p   | 1    | 1.351911 |
| mir-222-3p    | 1    | 1.188383 | mir-16-5p   | 1    | 1.188383 | mir-320a    | 1    | 1.351911 |
| let-7b-5p     | 1    | 1.415194 | mir-26a-5p  | 1    | 1.272795 | mir-125-5p  | 1    | 1.366987 |
| mir-19b-3p    | 1    | 1.147902 | mir-32-5p   | 1    | 2.020903 | mir-29b-3p  | 1    | 1.489677 |
| mir-17-5p     | 1    | 1.007654 | mir-26b-5p  | 1    | 1.181812 | mir-29a-3p  | 1    | 1.232852 |
| mir-93-5p     | 1    | 1.111109 | let-7g-5p   | 1    | 1.22264  | mir-141-3p  | 1    | 1.549715 |
| mir-186-5p    | 1    | 1.089752 | mir-30c-5p  | 1    | 1.255272 | mir-19a-3p  | 1    | 1.166349 |
| mir-196b-5p   | 1    | 1.190032 | mir-96-5p   | 1    | 1.693491 | mir-18a-5p  | 1    | 0.925304 |
| mir-27a-3p    | 1    | 1.336074 | mir-185-5p  | 1    | 1.350038 | mir-374a-5p | 1    | 1.088997 |
| mir-22-3p     | 1    | 1.223488 | mir-142-3p  | 1    | 2.242332 | mir-423-5p  | 1    | 1.293249 |
| mir-130a-3p   | 1    | 1.344435 | mir-24-3p   | 1    | 1.309485 | let-7a-5p   | 1    | 1.356604 |
| let-7c        | 1    | 1.432962 | mir-155-5p  | 1    | 2.005553 | mir-124-3p  | 1    | 1.491744 |
| mir-29c-3p    | 1    | 1.293249 | mir-146a-5p | 1    | 2.108183 | mir-92a-3p  | 1    | 1.177723 |
| mir-140-3p    | 1    | 1.311302 | mir-425-5p  | 1    | 1.095812 | mir-23a-3p  | 1    | 1.416175 |
| mir-128       | 1    | 1.151888 | mir-181b-5p | 1    | 1.297739 | mir-25-3p   | 1    | 1.083726 |
| let-7f-5p     | 1    | 1.309485 | mir-302b-3p | 1    | 1.370783 | let-7e-5p   | 1    | 1.260503 |
| mir-122-5p    | 1    | 1.125058 | mir-30b-5p  | 1    | 1.353786 | mir-376c-3p | 1    | 1.614402 |
| mir-20a-5p    | 1    | 1.018891 | mir-21-5p   | 1    | 1.524145 | mir-126-3p  | 1    | 1.338855 |
| mir-106b-5b   | 1    | 1.055554 | mir-30e-5p  | 1    | 1.345367 | mir-144-3p  | 1    | 0.893785 |
| mir-7-5p      | 1    | 1.054091 | mir-200c-3p | 1    | 1.081475 | mir-424-5p  | 1    | 1.417157 |
| mir-100-5p    | 1    | 1.128964 | mir-15b-5p  | 1    | 1.164734 | mir-30a-5p  | 1    | 1.343503 |
| mir-302c-3p   | 1    | 1.253533 | mir-223-3p  | 1    | 1.796265 | mir-23b-5p  | 1    | 1.349103 |
