# Supplementary material for: PRP4 Induces Epithelial–Mesenchymal Transition and Drug Resistance in Colon Cancer Cells via Activation of p53
Source: Int J Mol Sci. 2022 Mar 13;23(6):3092. doi: 10.3390/ijms23063092 (PMC8955441; doi:10.3390/ijms23063092)
Supplement: Supplementary file 1 [file ijms-23-03092-s001.zip]

Archive with 5 entries (5 files):
- Supplemental Figure S1.jpg
- Supplemental Figure S2.jpg
- Supplementary Table S1.pdf
- Supplementary Table S2.pdf
- Supplementary Table S3.pdf
